# Supplementary material
Source: Springer Nature journal article supplement (https://www.springermedizin.de/resource/supplementary/13058_2010_2537_MOESM3_ESM.pdf/9701644)

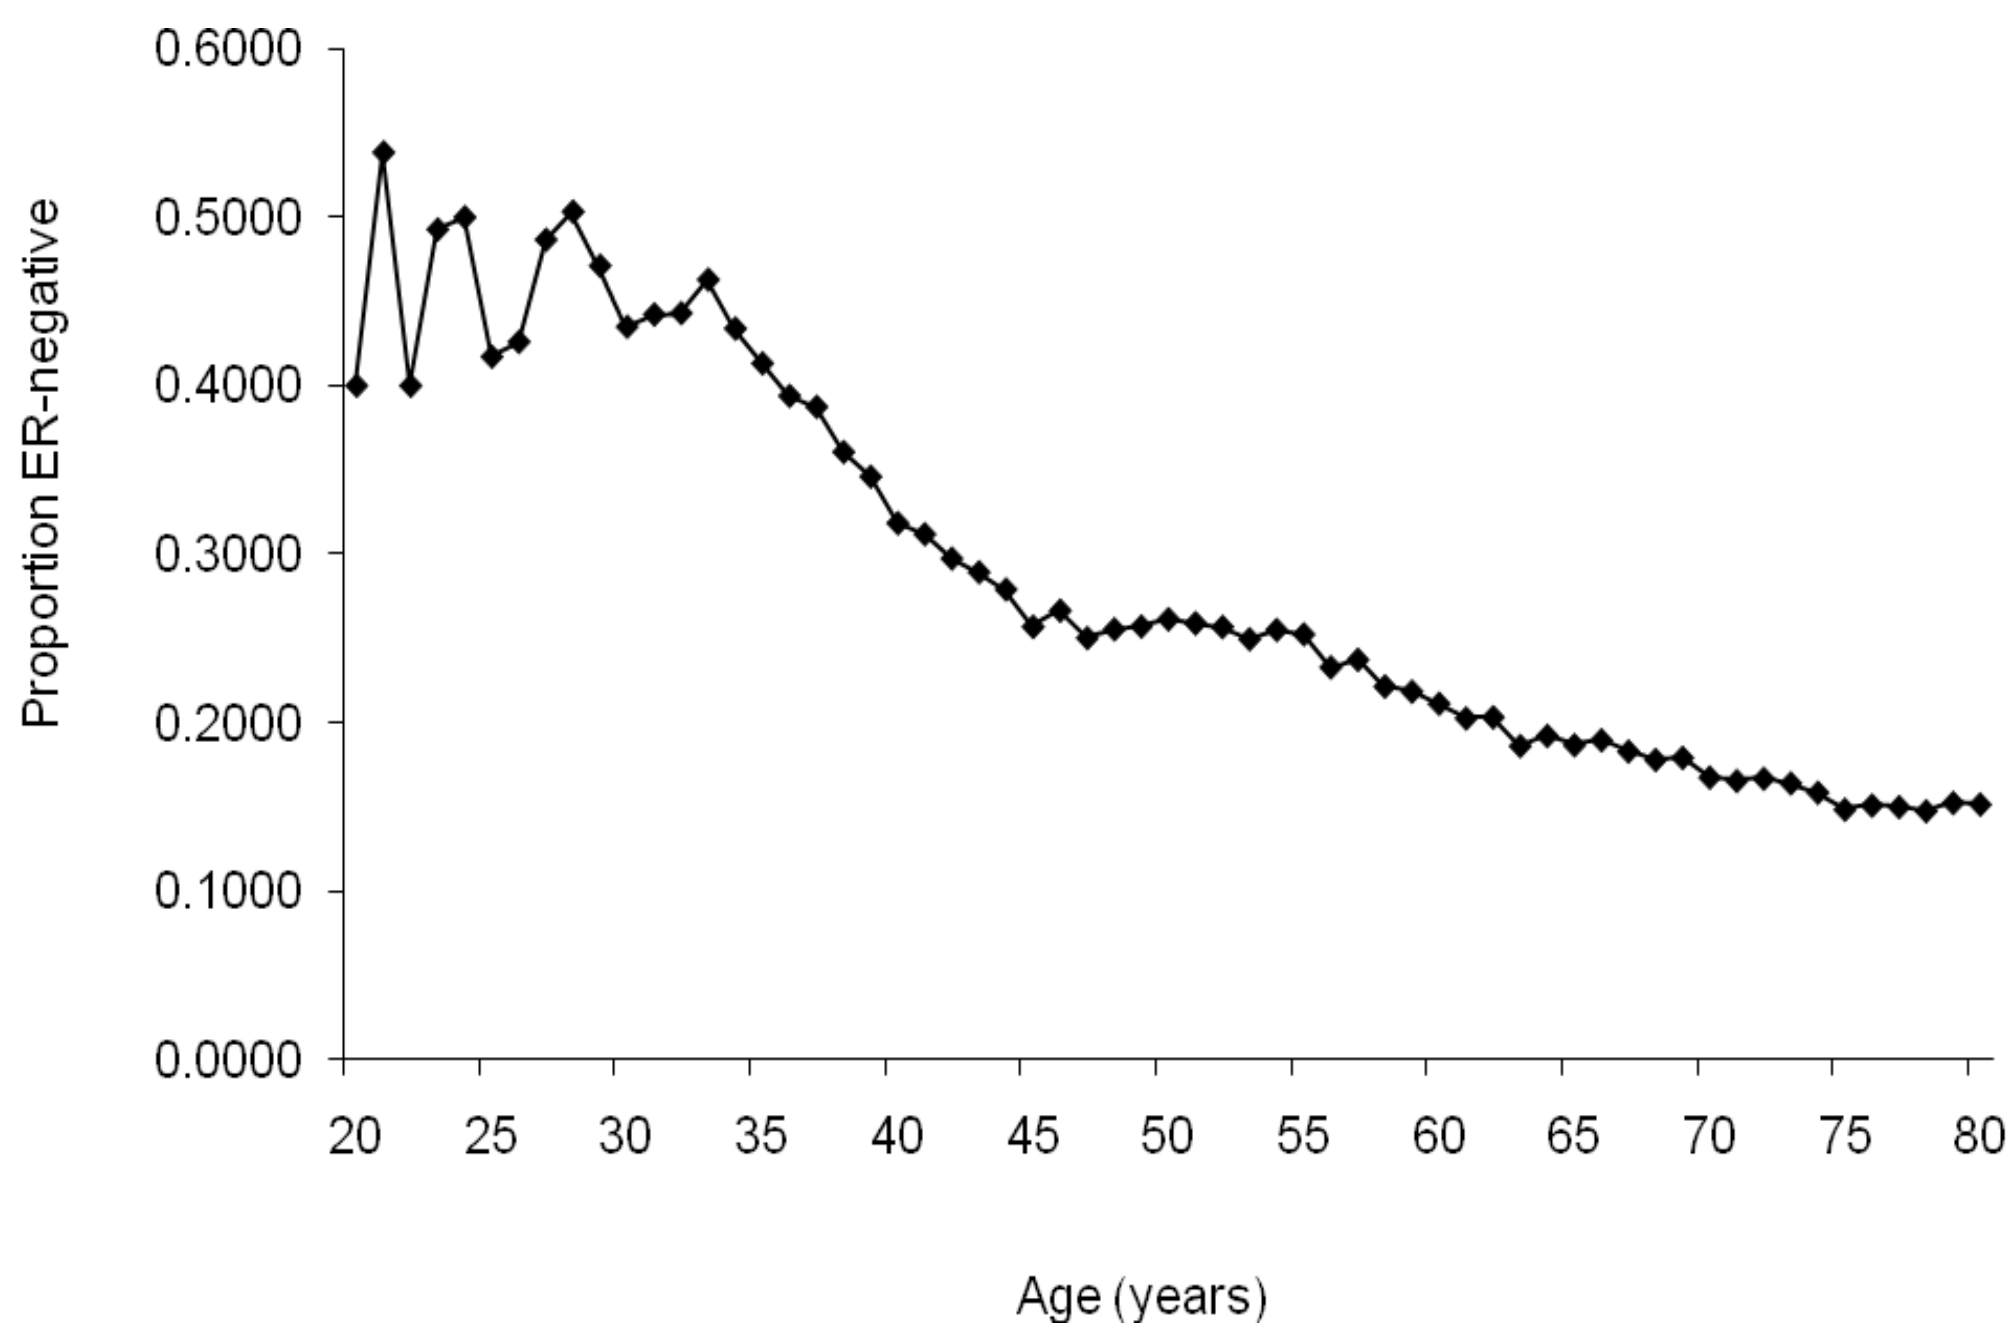

Supplement: MOESM3 [file 9701644]
